# Supplementary material for: Inherited and SomaticCD3ζ Mutations in a Patient with T-Cell Deficiency
Source: Atypon-hosted journal article supplement (doi:10.1056/nejmoa053750), 2006-05-03
Supplement: nejm_rieux-laucat_1913sa1.pdf [file nejm_rieux-laucat_1913sa1.pdf]

## Supplementary Appendix

This appendix has been provided by the authors to give readers additional information about their work.

Supplement to: Rieux-Laucat F, Hivroz C, Lim A, et al. Inherited and somatic CD3 $\zeta$  mutations in a patient with T-cell deficiency. *N Engl J Med* 2006;354:1913-21.

Supplement 1:

CD3 $\zeta$ -specific RT-PCR was performed using a standard method and the following primers:

CD3z F48:5'-CCCCACAGTCCTCCACTTCC-3';

F257:5'CTGGATCCCAAACCTCTGCTA-3'; CD3z R738:

GTGAACCGGGTTGTAAATGC;

CD3 $\zeta$  exon 3 was amplified by PCR, using the following primers:

CD3ZE3F:5'-TTCAGCAGGAGCGCAGACGC-3';

CD3ZI3R:5'ACTAAGCTCGTTCCATGCAT-3';
